# Supplementary material for: Progression of the faecal microbiome in preweaning dairy calves that develop cryptosporidiosis
Source: Anim Microbiome. 2025 Jan 6;7:3. doi: 10.1186/s42523-024-00352-1 (PMC11706078; doi:10.1186/s42523-024-00352-1)
Supplement: Supplementary file 5 — Additional file 5: MaAsLin2 Phylum Farm 2–3 Longitudinal Results [file 42523_2024_352_MOESM5_ESM.xlsx]

## Sheet: W1_80%
Week 1 (0.01% in ≥80%)
Shared	H	Cp+
Bifidobacterium	Enterococcaceae_unclassified	Enterococcus
Streptococcus		Lactobacillales_unclassified
Clostridiaceae_1_unclassified
Clostridium_sensu_stricto
Lachnospiraceae_unclassified
Butyricicoccus
Ruminococcaceae_unclassified
Enterobacteriaceae_unclassified
Escherichia/Shigella

## Sheet: W5_80%
Week 5 (0.01% in ≥80%)
Shared	H	Cp+
Bifidobacterium	Anaerobutyricum	Alloprevotella
Olsenella	Holdemanella	Limosilactobacillus
Collinsella	Succiniclasticum	Clostridiales_Incertae_Sedis_XIII_unclassified
Bacteria_unclassified	Escherichia/Shigella	Ruminococcus2
Bacteroidetes_unclassified	Gallibacterium	Erysipelotrichaceae_unclassified
Phocaeicola
Bacteroidales_unclassified
Prevotella
Prevotellaceae_unclassified
Prevotellamassilia
Streptococcus
Clostridiales_unclassified
Anaerostipes
Anaerotignum
Blautia
Dorea
Fusicatenibacter
Lachnospiraceae_unclassified
Mediterraneibacter
Butyricicoccus
Faecalibacterium
Flintibacter
Fournierella
Negativibacillus
Pseudoflavonifractor
Ruminococcaceae_unclassified
Firmicutes_unclassified
Phascolarctobacterium
Megamonas
Selenomonadaceae_unclassified
Pelistega
Sutterella

## Sheet: W10_80%
Week 10 (0.01% in ≥80%)
Shared	H	Cp+
Olsenella	Ihubacter
Collinsella	Anaerobutyricum
Bacteria_unclassified	Dorea
Bacteroidetes_unclassified	Roseburia
Bacteroidaceae_unclassified
Bacteroides
Phocaeicola
Bacteroidales_unclassified
Muribaculaceae_unclassified
Odoribacter
Parabacteroides
Porphyromonadaceae_unclassified
Prevotella
Prevotellaceae_unclassified
Prevotellamassilia
Candidatus_Saccharibacteria_unclassified
Clostridiales_Incertae_Sedis_XIII_unclassified
Clostridiales_unclassified
Anaerotignum
Blautia
Frisingicoccus
Fusicatenibacter
Lachnospiraceae_unclassified
Mediterraneibacter
Butyricicoccus
Faecalibacterium
Flintibacter
Fournierella
Negativibacillus
Oscillibacter
Pseudoflavonifractor
Ruminococcaceae_unclassified
Erysipelotrichaceae_unclassified
Firmicutes_unclassified
Phascolarctobacterium
Selenomonadaceae_unclassified
Sutterella
Escherichia/Shigella
